# Supplementary material for: Role of long non‑coding RNA leucine‑rich repeat containing 75 A‑antisense RNA1 in the invasion and progression of renal cell carcinoma
Source: Oncol Rep. 2024 Nov 14;53(1):11. doi: 10.3892/or.2024.8844 (PMC11603548; doi:10.3892/or.2024.8844)
Supplement: Supporting Data [file Supplementary_Data2.xlsx]

## Sheet: Sheet1
Table SI. A total of 66 miRNAs identified by a bioinformatician as having potential binding sites on LRRC75A-AS1.
No.	miRNA (Query)	Target (Subject)	Score	Energy (Kcal/Mol)	Query-start	Query-end	Subject-start	Subject-end	Length (alignment)	Subject-Identity	Query-Identity
1	hsa-miR-12120	ENST05220043563.1	163	-27.32	2	24	269	294	22	0.6364	0.7727
2	hsa-miR-12122	ENST05220043563.1	167	-27.86	2	20	2430	2454	18	0.7778	0.8333
3	hsa-miR-1233-3p	ENST05220043563.1	162	-24.12	2	19	814	833	17	0.7647	0.8235
4	hsa-miR-1264	ENST05220043563.1	163	-21.95	2	22	970	991	20	0.75	0.8
5	hsa-miR-1914-3p	ENST05220043563.1	169	-35.75	2	19	1706	1729	19	0.8421	0.8421
6	hsa-miR-1976	ENST05220043563.1	161	-22.41	2	18	2603	2622	16	0.8125	0.8125
7	hsa-miR-29a-5p	ENST05220043563.1	163	-22.66	2	21	1067	1092	23	0.6957	0.7826
8	hsa-miR-3127-3p	ENST05220043563.1	162	-28.42	2	19	2129	2150	17	0.7059	0.8824
9	hsa-miR-3127-5p	ENST05220043563.1	172	-27.68	2	22	1803	1826	21	0.7619	0.8571
10	hsa-miR-3192-5p	ENST05220043563.1	161	-26.9	2	22	1844	1866	20	0.65	0.8
11	hsa-miR-324-5p	ENST05220043563.1	160	-22.87	2	20	788	807	18	0.7778	0.8333
12	hsa-miR-3620-5p	ENST05220043563.1	161	-28.65	2	19	242	264	18	0.7778	0.8333
13	hsa-miR-3622a-3p	ENST05220043563.1	163	-25.93	2	21	882	905	21	0.7619	0.7619
14	hsa-miR-3664-5p	ENST05220043563.1	162	-22.51	2	20	205	230	22	0.7273	0.7727
15	hsa-miR-370-5p	ENST05220043563.1	164	-22.34	2	21	1273	1292	19	0.7895	0.8947
16	hsa-miR-4446-3p	ENST05220043563.1	161	-26.64	2	18	1803	1824	16	0.8125	0.8125
17	hsa-miR-4446-5p	ENST05220043563.1	172	-31.55	2	21	875	896	19	0.7895	0.8421
18	hsa-miR-4640-5p	ENST05220043563.1	168	-34.44	2	22	2421	2446	23	0.6957	0.8261
19	hsa-miR-4649-3p	ENST05220043563.1	174	-33.9	2	20	796	817	19	0.8421	0.8947
20	hsa-miR-4685-3p	ENST05220043563.1	165	-30.79	2	19	1458	1480	18	0.8333	0.8333
21	hsa-miR-4685-3p	ENST05220043563.1	166	-29.49	2	21	1422	1445	21	0.7619	0.8571
22	hsa-miR-4693-3p	ENST05220043563.1	160	-22.59	2	19	1826	1847	17	0.7647	0.8824
23	hsa-miR-4726-5p	ENST05220043563.1	168	-37.71	2	22	2422	2446	22	0.7273	0.8182
24	hsa-miR-4738-5p	ENST05220043563.1	160	-23.27	2	21	2822	2843	19	0.6842	0.7895
25	hsa-miR-4755-3p	ENST05220043563.1	169	-26.53	2	18	1	17	16	0.8125	0.9375
26	hsa-miR-5006-3p	ENST05220043563.1	165	-30.15	2	19	874	895	18	0.7778	0.8889
27	hsa-miR-5092	ENST05220043563.1	160	-21.43	2	21	2583	2603	20	0.8	0.8
28	hsa-miR-5189-5p	ENST05220043563.1	190	-39.57	2	23	1251	1274	21	0.8571	0.9048
29	hsa-miR-518d-5p	ENST05220043563.1	165	-31.61	2	20	1098	1121	20	0.8	0.85
30	hsa-miR-518e-5p	ENST05220043563.1	165	-32.02	2	20	1098	1121	20	0.8	0.85
31	hsa-miR-518f-5p	ENST05220043563.1	165	-28.06	2	20	1098	1121	20	0.8	0.85
32	hsa-miR-5190	ENST05220043563.1	160	-25.83	2	20	2325	2346	20	0.8	0.8
33	hsa-miR-5192	ENST05220043563.1	163	-28.87	2	21	1826	1848	20	0.7	0.85
34	hsa-miR-519a-5p	ENST05220043563.1	165	-32.02	2	20	1098	1121	20	0.8	0.85
35	hsa-miR-519b-5p	ENST05220043563.1	165	-32.02	2	20	1098	1121	20	0.8	0.85
36	hsa-miR-519c-5p	ENST05220043563.1	165	-32.02	2	20	1098	1121	20	0.8	0.85
37	hsa-miR-520c-5p	ENST05220043563.1	165	-31.61	2	20	1098	1121	20	0.8	0.85
38	hsa-miR-522-5p	ENST05220043563.1	165	-32.02	2	20	1098	1121	20	0.8	0.85
39	hsa-miR-523-5p	ENST05220043563.1	165	-32.02	2	20	1098	1121	20	0.8	0.85
40	hsa-miR-526a-5p	ENST05220043563.1	165	-31.61	2	20	1098	1121	20	0.8	0.85
41	hsa-miR-557	ENST05220043563.1	168	-26.13	2	21	630	652	19	0.6842	0.8947
42	hsa-miR-5588-3p	ENST05220043563.1	164	-21.04	2	18	2121	2140	17	0.8235	0.8824
43	hsa-miR-637	ENST05220043563.1	180	-35.71	2	22	914	939	22	0.8182	0.8636
44	hsa-miR-6502-3p	ENST05220043563.1	169	-24.75	2	19	992	1015	20	0.8	0.85
45	hsa-miR-6506-5p	ENST05220043563.1	160	-20.73	2	21	940	962	19	0.7368	0.7368
46	hsa-miR-6732-3p	ENST05220043563.1	173	-31.45	2	18	2155	2177	16	0.875	0.9375
47	hsa-miR-6733-3p	ENST05220043563.1	174	-24.41	2	19	1958	1977	17	0.8824	0.8824
48	hsa-miR-6740-3p	ENST05220043563.1	161	-20.23	2	18	968	989	16	0.8125	0.8125
49	hsa-miR-6741-5p	ENST05220043563.1	167	-26.45	2	21	326	348	20	0.75	0.85
50	hsa-miR-6742-3p	ENST05220043563.1	162	-30.08	2	17	864	882	15	0.8667	0.9333
51	hsa-miR-6762-5p	ENST05220043563.1	169	-28.78	2	22	2425	2447	20	0.7	0.85
52	hsa-miR-6780a-3p	ENST05220043563.1	165	-29.78	2	19	2342	2365	20	0.75	0.85
53	hsa-miR-6791-5p	ENST05220043563.1	161	-34.8	2	18	1847	1868	16	0.6875	0.9375
54	hsa-miR-6815-3p	ENST05220043563.1	160	-21.58	2	13	253	273	11	1	1
55	hsa-miR-6833-5p	ENST05220043563.1	179	-29.63	2	20	1720	1741	18	0.8889	0.8889
56	hsa-miR-6849-3p	ENST05220043563.1	163	-28.05	2	21	782	800	19	0.8421	0.8421
57	hsa-miR-6854-5p	ENST05220043563.1	164	-22.62	2	23	408	434	24	0.7083	0.7917
58	hsa-miR-6857-5p	ENST05220043563.1	173	-33.6	2	21	2915	2934	19	0.8421	0.8947
59	hsa-miR-6868-3p	ENST05220043563.1	160	-28.8	2	20	334	354	19	0.7895	0.8421
60	hsa-miR-6868-3p	ENST05220043563.1	165	-23.47	2	19	674	695	18	0.8333	0.8333
61	hsa-miR-7107-3p	ENST05220043563.1	162	-24.9	2	24	1159	1189	26	0.6154	0.7692
62	hsa-miR-7114-5p	ENST05220043563.1	160	-25.48	2	20	527	545	18	0.7778	0.8333
63	hsa-miR-7156-5p	ENST05220043563.1	160	-20.08	2	22	203	226	21	0.7143	0.7619
64	hsa-miR-7157-3p	ENST05220043563.1	163	-20.21	2	20	1746	1767	18	0.7778	0.7778
65	hsa-miR-7160-5p	ENST05220043563.1	174	-28.71	2	20	1735	1756	19	0.8421	0.8947
66	hsa-miR-942-5p	ENST05220043563.1	163	-24.57	2	20	1420	1441	18	0.6667	0.8889
LRRC75A-AS1, leucine-rich repeat containing 75 A-antisense RNA1; miR, microRNA.

## Sheet: header information
Query-start	start position of Query
Query-end	end position of Query
Subject-start	start position of Subject
Subjetct-end	end position of Subject
Length (alignment)	Length used for alignment
